# Supplementary material for: Field Validation of the Southern Rock Lobster Paralytic Shellfish Toxin Monitoring Program in Tasmania, Australia
Source: MDPI journal article supplement (doi:10.3390/md19090510), 2021-09-08
Supplement: s1 [file s1]

**Supplementary Table S1.** Paralytic shellfish toxin analogues in *Jasus edwardsii* hepatopancreas from Okehampton Bay, Maria zone, during uptake and depuration in 2019. All concentrations in millimoles kg<sup>-1</sup>, ND = not detected.

| Date       | STX  | NEO | GTX1&4 | GTX2&3 | GTX5 | C1&2  | C3&4 | dcSTX | dcGTX2&3 | Total |
|------------|------|-----|--------|--------|------|-------|------|-------|----------|-------|
| 1/07/2019  | ND   | ND  | ND     | 0.34   | ND   | ND    | 0.20 | ND    | ND       | 0.54  |
| 1/07/2019  | ND   | ND  | ND     | 0.30   | ND   | ND    | 0.20 | ND    | ND       | 0.50  |
| 1/07/2019  | ND   | ND  | ND     | ND     | ND   | ND    | ND   | ND    | ND       | ND    |
| 1/07/2019  | ND   | ND  | ND     | ND     | ND   | ND    | ND   | ND    | ND       | ND    |
| 1/07/2019  | ND   | ND  | ND     | ND     | ND   | ND    | ND   | ND    | ND       | ND    |
| 5/08/2019  | 0.43 | ND  | ND     | 0.42   | ND   | 2.31  | 0.61 | ND    | ND       | 3.78  |
| 5/08/2019  | ND   | ND  | ND     | ND     | ND   | 4.42  | 1.63 | ND    | ND       | 6.05  |
| 5/08/2019  | ND   | ND  | ND     | ND     | ND   | 1.26  | 0.20 | ND    | ND       | 1.47  |
| 5/08/2019  | ND   | ND  | ND     | 0.21   | ND   | 1.68  | ND   | ND    | ND       | 1.89  |
| 5/08/2019  | 0.30 | ND  | ND     | ND     | ND   | 1.26  | ND   | ND    | ND       | 1.56  |
| 3/09/2019  | ND   | ND  | 0.39   | 0.67   | ND   | 1.89  | 0.20 | ND    | ND       | 3.16  |
| 3/09/2019  | ND   | ND  | ND     | 0.25   | ND   | 0.63  | 0.20 | ND    | ND       | 1.09  |
| 3/09/2019  | ND   | ND  | ND     | 0.25   | ND   | 1.05  | ND   | ND    | ND       | 1.30  |
| 3/09/2019  | ND   | ND  | 0.15   | 0.72   | ND   | 1.26  | 0.20 | ND    | ND       | 2.33  |
| 3/09/2019  | 0.20 | ND  | ND     | ND     | ND   | ND    | ND   | ND    | ND       | 0.20  |
| 7/10/2019  | 0.20 | ND  | 1.48   | 2.49   | ND   | 2.94  | ND   | ND    | ND       | 7.12  |
| 7/10/2019  | ND   | ND  | 4.18   | 5.94   | ND   | 6.94  | ND   | ND    | ND       | 17.07 |
| 7/10/2019  | 0.27 | ND  | 8.60   | 9.86   | ND   | 12.41 | 0.20 | ND    | ND       | 31.35 |
| 7/10/2019  | ND   | ND  | ND     | ND     | ND   | ND    | ND   | ND    | ND       | ND    |
| 7/10/2019  | ND   | ND  | ND     | ND     | ND   | ND    | ND   | ND    | ND       | ND    |
| 22/10/2019 | 0.17 | ND  | 0.92   | 1.43   | ND   | 1.89  | ND   | ND    | ND       | 4.42  |
| 22/10/2019 | ND   | ND  | ND     | ND     | ND   | ND    | ND   | ND    | ND       | ND    |
| 22/10/2019 | ND   | ND  | 0.49   | 0.30   | ND   | 0.63  | ND   | ND    | ND       | 1.41  |
| 22/10/2019 | 0.40 | ND  | 0.92   | 3.33   | ND   | 3.37  | ND   | ND    | ND       | 8.02  |
| 22/10/2019 | ND   | ND  | 0.12   | 1.05   | ND   | 1.05  | ND   | ND    | ND       | 2.23  |
| 4/11/2019  | 0.17 | ND  | ND     | 0.59   | ND   | ND    | ND   | ND    | ND       | 0.76  |
| 4/11/2019  | 0.23 | ND  | 0.15   | 1.18   | ND   | 1.05  | ND   | ND    | ND       | 2.61  |
| 4/11/2019  | 0.23 | ND  | ND     | 0.84   | ND   | 0.84  | ND   | ND    | ND       | 1.92  |
| 4/11/2019  | 0.33 | ND  | 0.19   | 2.23   | ND   | 1.68  | ND   | ND    | ND       | 4.45  |
| 4/11/2019  | 0.30 | ND  | ND     | 0.97   | ND   | 0.63  | ND   | ND    | ND       | 1.90  |
| 18/11/2019 | 0.37 | ND  | ND     | 1.18   | ND   | 1.26  | ND   | ND    | ND       | 2.81  |
| 18/11/2019 | 0.43 | ND  | ND     | 0.63   | ND   | 0.63  | ND   | ND    | ND       | 1.70  |
| 18/11/2019 | 0.47 | ND  | ND     | 0.34   | ND   | ND    | ND   | ND    | ND       | 0.80  |
| 18/11/2019 | 0.37 | ND  | ND     | 0.72   | ND   | ND    | ND   | ND    | ND       | 1.08  |
| 18/11/2019 | 0.20 | ND  | ND     | 0.46   | ND   | ND    | ND   | ND    | ND       | 0.66  |
